# Supplementary material for: Development of The Use of Primary Health Care Emergency Departments After Interventions Aimed At Decreasing Overcrowding: A Longitudinal Follow-up Study
Source: Research Square preprint supplement (doi:10.21203/rs.3.rs-952978/v1), 2021-11-19
Supplement: Supplementary file 1 [file 322e0d419e8fd51a9b85a456.docx]

**Table 2** Development of the proportions of the twenty most common ICD-10 diagnoses in 2002-2014 in primary care EDs. The arrows show the direction of the observed change.

| **ICD-10 code** | **Name of diagnosis** | **Rate of change (mean±SEM, %/year)** | **p-value** |
| --- | --- | --- | --- |
| **J06** | Acute upper respiratory infections of multiple and unspecified sites | -0,00618±0,000740 | **<0,001↓** |
| **R10** | Abdominal and pelvic pain | 0,00312±0,000284 | **<0,001↑** |
| **H66** | Suppurative and unspecified otitis media | -0,00430±0,000305 | **<0,001↓** |
| **M54** | Dorsalgia | -0,00195±0,000175 | **<0,001↓** |
| **S01** | Open wound of head | 0,000880±0,000246 | **0,004↑** |
| **J20** | Acute bronchitis | 0,00365±0,000362 | **<0,001↑** |
| **A09** | Other gastroenteritis and colitis of infectious and unspecified origin | -0,00101±0,000133 | **<0,001↓** |
| **F10** | Mental and behavioural disorder due to use of alcohol | 0,00261±0,000257 | **<0,001↑** |
| **R07** | Pain in throat and chest | 0,00148±0,000106 | **<0,001↑** |
| **S93** | Dislocation, sprain and strain of joints and ligaments at ankle and foot level | -0,000614±0,000156 | **0,002↓** |
| **S61** | Open wound of wrist and hand | -0,0000183±0,000186 | n.s. |
| **N30** | Cystitis | 0,000297±0,000108 | **0,019↑** |
| **J03** | Acute tonsillitis | -0,00270±0,000243 | **<0,001↓** |
| **H10** | Conjunctivitis | -0,00156±0,000294 | **<0,001↓** |
| **J01** | Acute sinusitis | -0,00284±0,000324 | **<0,001↓** |
| **M79** | Other soft tissue disorders, not elsewhere classified | 0,00159±0,000177 | **<0,001↑** |
| **S06** | Intracranial injury | 0,0000570±0,000116 | n.s. |
| **R53** | Malaise and fatigue | 0,00169±0,000160 | **<0,001↑** |
| **R06** | Abnormalities of breathing | 0,000741±0,000164 | **<0,001↑** |
| **S52** | Fracture of forearm | 0,00108±0,000236 | **<0,001↑** |
