# Supplementary material for: Development of The Use of Primary Health Care Emergency Departments After Interventions Aimed At Decreasing Overcrowding: A Longitudinal Follow-up Study
Source: Research Square preprint supplement (doi:10.21203/rs.3.rs-952978/v1), 2021-11-19
Supplement: Supplementary file 4 [file 5ecf42a6636e2dfb3dc89bde.docx]

**Table 3** Development of the absolute values of the twenty most common ICD-10 diagnoses in 2002-2014 in primary care EDs. The arrows show the direction of the observed change.

| **ICD-10 code** | **Name of diagnosis** | **Rate of change (mean±SEM, N/year)** | **p-value** |
| --- | --- | --- | --- |
| **J06** | Acute upper respiratory infections of multiple and unspecified sites | 125,637±33,307 | **0,003↓** |
| **R10** | Abdominal and pelvic pain | 127,802±20,857 | **<0,001↑** |
| **H66** | Suppurative and unspecified otitis media | 0,00864±0,00162 | **<0,001↓** |
| **M54** | Dorsalgia | 22,176±15,721 | n.s. |
| **S01** | Open wound of head | 46,604±10,158 | **<0,001↑** |
| **J20** | Acute bronchitis | 80,484±16,028 | **<0,001↓** |
| **A09** | Other gastroenteritis and colitis of infectious and unspecified origin | 11,791±8,672 | n.s. |
| **F10** | Mental and behavioural disorder due to use of alcohol | 90,011±9,114 | **<0,001↑** |
| **R07** | Pain in throat and chest | 0,0147±0,00193 | **<0,001↑** |
| **S93** | Dislocation, sprain and strain of joints and ligaments at ankle and foot level | 2,396±5,381 | n.s. |
| **S61** | Open wound of wrist and hand | 13,813±5,642 | **0,032↑** |
| **N30** | Cystitis | 22,154±6,185 | **0,004↑** |
| **J03** | Acute tonsillitis | 60,918±6,996 | **<0,001↓** |
| **H10** | Conjunctivitis | 31,341±6,078 | **<0,001↓** |
| **J01** | Acute sinusitis | 67,214±11,802 | **<0,001↓** |
| **M79** | Other soft tissue disorders, not elsewhere classified | 55,604±8,155 | **<0,001↑** |
| **S06** | Intracranial injury | 12,148±5,756 | n.s. |
| **R53** | Malaise and fatigue | 0,0152±0,00179 | **<0,001↑** |
| **R06** | Abnormalities of breathing | 29,582±6,004 | **<0,001↑** |
| **S52** | Fracture of forearm | 39,846±8,320 | **<0,001↑** |
