# Supplementary material for: Development of The Use of Primary Health Care Emergency Departments After Interventions Aimed At Decreasing Overcrowding: A Longitudinal Follow-up Study
Source: Research Square preprint supplement (doi:10.21203/rs.3.rs-952978/v1), 2021-11-19
Supplement: Supplementary file 5 [file 6169a1f65d4f65e34d02297a.docx]

**Table 1** Development of the proportions of main ICD-10 diagnosis groups in 2002-2014 in primary care EDs. The arrows show the direction of the observed change.

| **ICD-10** | **Contents of diagnosis group** | **Rate of change (mean±SEM, %/year)** | **p-value** |
| --- | --- | --- | --- |
| **A** | Intestinal infectious diseases, bacterial infections and viral infections of central nervous system | -0,0540±0,0235 | **0,042↓** |
| **B** | Other infections | -0,0337±0,00515 | **<0,001↓** |
| **C** | Malignant neoplasms | 0,0136±0,00419 | **0,008↑** |
| **D** | Other neoplasms and Carcinoma in situ | 0,00538±0,00309 | n.s. |
| **E** | Endocrine nutritional and metabolic diseases | 0,0514±0,00555 | **<0,001↑** |
| **F** | Mental and behavioural disorders | 0,443±0,0434 | **<0,001↑** |
| **G** | Diseases of the nervous systems | 0,0449±0,0174 | **0,026↑** |
| **H** | Diseases of the eye and the adnexa, and the ear and mastoid process | -0,721±0,0631 | **<0,001↓** |
| **I** | Diseases of the circulatory system | 0,210±0,0427 | **<0,001↑** |
| **J** | Diseases of the respiratory system | -1,708±0,159 | **<0,001↓** |
| **K** | Diseases of the digestive system | 0,0597±0,0250 | **0,036↑** |
| **L** | Diseases of the skin and subcutaneous tissue | 0,00245±0,0248 | n.s. |
| **M** | Diseases of the musculoskeletal system and connective tissue | -0,203±0,0443 | **<0,001↓** |
| **N** | Diseases of genitourinary system | 0,166±0,0226 | **<0,001↑** |
| **O** | Pregnancy, childbirth and puerperium | -0,00530±0,00227 | **0,039↓** |
| **P** | Certain conditions originating in the perinatal period | -0,000391±0,000469 | n.s. |
| **Q** | Congenital malformations, deformations and chromosomal abnormalities | -0,000793±0,000637 | n.s. |
| **R** | Symptoms, signs and abnormal clinical and laboratory findings, not elsewhere classified | 1,050±0,0958 | **<0,001↑** |
| **S** | Injury, poisoning and certain other consequences of external causes, single body region | 0,451±0,0914 | **<0,001↑** |
| **T** | Injuries to multiple or unspecified body regions as well as poisoning and certain other consequences of external causes. | 0,0647±0,0345 | n.s. |
| **V** | Transport accidents | 0,0122±0,00669 | n.s. |
| **W** | Other external causes of accidental injury | 0,0529±0,00916 | **<0,001↑** |
| **X** | Exposure to burning substances and related threads, venomous animals and plants, noxious substances and forces of nature. Intentional self-harm and assault | 0,0349±0,00621 | **<0,001↑** |
| **Y** | Events of undetermined intent, legal interventions and operations of war, complications of medical care, sequelae of external causes of morbidity and mortality | 0,0122±0,00464 | **0,024↑** |
| **Z** | Factors influencing health status and contact with health services | 0,0513±0,0189 | **0,020↑** |
